# Supplementary material for: Shape-controllable hydrothermal synthesis of NaTbF4:Eu3+microcrystals with energy transfer from Tb to Eu and multicolor luminescence properties
Source: Royal Society of Chemistry journal article supplement (doi:10.1039/c5ce01292a), 2015-01-01
Supplement: c5ce01292a1.pdf [file c5ce01292a1.pdf]

## Electronic Supplementary Information

### Shape-Controllable Hydrothermal Synthesis of NaTbF<sub>4</sub>:Eu<sup>3+</sup> Microcrystals with Energy Transfer from Tb to Eu and Multicolor Luminescent Properties

Yi Luo<sup>a</sup>, Renhe Yang<sup>a</sup>, Xinlei Zhang<sup>b</sup>, Bin Hu<sup>b</sup>, Shanshan Hu<sup>\*a</sup>, Lei Zhou<sup>a</sup>, Jun Yang<sup>\*a</sup>

<sup>a</sup> School of Chemistry and Chemical Engineering, Southwest University, Chongqing 400715, China.

<sup>b</sup>The Key Laboratory of Rare Earth Functional Materials and Applications, Zhoukou Normal University, Zhoukou City 466001, PR China

\*Corresponding author. E-mail: [jyang@swu.edu.cn](mailto:jyang@swu.edu.cn) and [hushan3@swu.edu.cn](mailto:hushan3@swu.edu.cn)

**Table S1.** The doping rate of Eu<sup>3+</sup> in the NaTbF<sub>4</sub>:x% Eu<sup>3+</sup> (x = 0-1).

| Sample | Nominal doping concentration of Eu-ion (mole percent) | Doping quality of Eu-ion (μg) | Residual concentration of Eu-ion (μg/ml) | Residual quality of Eu-ion (μg) | Real doping rate of Eu-ion (percent) | Real doping concentration of Eu-ion (mole percent) |
|--------|-------------------------------------------------------|-------------------------------|------------------------------------------|---------------------------------|--------------------------------------|----------------------------------------------------|
| 1      | 0.01%                                                 | 15.19                         | 0.01                                     | 0.3                             | 98.03%                               | 0.0098%                                            |
| 2      | 0.03%                                                 | 45.57                         | 0.00 (<0.01)                             | 0.0 (<0.3)                      | 100% (>99.34%)                       | >0.0298%                                           |
| 3      | 0.1%                                                  | 151.9                         | 0.00 (<0.01)                             | 0.0 (<0.3)                      | 100% (>99.80%)                       | >0.0998%                                           |
| 4      | 0.5%                                                  | 759.5                         | 0.00 (<0.01)                             | 0.0 (<0.3)                      | 100% (>99.96%)                       | >0.4998%                                           |
| 5      | 1%                                                    | 1519                          | 0.00 (<0.01)                             | 0.0 (<0.3)                      | 100% (>99.98%)                       | >0.9998%                                           |

There are a few of residual Eu-ions (0.3  $\mu\text{g}$ ) in the supernatant in sample 1. The doping rate of Eu-ions was calculated by  $\text{doping rate} = (\text{doping quality} - \text{residual quality}) / \text{doping quality}$ . It can be seen from the table that there is no traces of Eu-ions in the supernatant of other four samples. However, due to the minimum detection limit of the ICP-AES, the Eu-ions concentration under 0.01  $\mu\text{g}/\text{ml}$  cannot be detected. So, we used 0.01 $\mu\text{g}/\text{ml}$  as a critical value to calculate the corresponding doping rate (data in brackets). The Eu-ions doping rates of the five samples are high (almost equal to 100%), thus, the real content of the Eu-ions is consistent with the nominal composition (see the above table).
